# Supplementary material for: Development and Validity-Reliability Analysis of the Cultural Bullying Scale: A Methodological Study
Source: Research Square preprint supplement (doi:10.21203/rs.3.rs-7693573/v1), 2025-10-15
Supplement: Supplementary file 1 [file 788dc68b44874f33256ac9ee.docx]

| Below are some statements relating to CULTURAL BULLYING. There are no correct or incorrect answers. Please indicate the extent to which you agree with the statement by marking an (**X**) in the box.  **STATEMENTS** | **I definitely disagree** | **I disagree** | **I am undecided** | **I agree** | **I definitely agree** |
| --- | --- | --- | --- | --- | --- |
| 1. I don’t want to interact with people from other cultures. |  |  |  |  |  |
| 2. I don’t want to establish friendships with people from other cultures. |  |  |  |  |  |
| 3. I see my own culture as superior to others. |  |  |  |  |  |
| 4. The traditions and customs of people from different cultures seem meaningless to me. |  |  |  |  |  |
| 5. People from different cultures disrupt social harmony. |  |  |  |  |  |
| 6. People from other cultures deserve less respect. |  |  |  |  |  |
| 7. I don’t want to work in the same space as people from another culture. |  |  |  |  |  |
| 8. I don’t want to start a family with people from another culture. |  |  |  |  |  |
| 9. People from other cultures should be excluded. |  |  |  |  |  |
| 10. Cultural differences cause conflict in society. |  |  |  |  |  |
| 11. I don't make an effort to understand people from different cultures. |  |  |  |  |  |
| 12. I accord less value to people from other cultures. |  |  |  |  |  |
| 13. I belittle people from other cultures because of language differences. |  |  |  |  |  |
| 14. I make fun of clothing styles from different cultures. |  |  |  |  |  |
| 15. I don’t hesitate to threaten people from different cultures. |  |  |  |  |  |
| 16. I don’t hesitate to swear at people from different cultures. |  |  |  |  |  |
| 17. I don't hesitate to give people from different cultures a nickname they might not like. |  |  |  |  |  |
| 18. I don't hesitate to quarrel with people from different cultures. |  |  |  |  |  |
| 19. I incite others against people from different cultures. |  |  |  |  |  |
| 20. I hate people from other cultures. |  |  |  |  |  |
| 21. I think people from other cultures are ignorant. |  |  |  |  |  |
